# Supplementary material for: Metabolic phenotyping reveals an emerging role of ammonia abnormality in Alzheimer’s disease
Source: Springer Nature journal article supplement (doi:10.1038/s41467-024-47897-y), 2024-05-07
Supplement: MOESM1 [file 41467_2024_47897_MOESM1_ESM.pdf]

## **Supplementary information**

### **Metabolic phenotyping reveals an emerging role of ammonia abnormality in Alzheimer's disease**

Tianlu Chen<sup>1#</sup>, Fengfeng Pan<sup>2#</sup>, Qi Huang<sup>3#</sup>, Guoxiang Xie<sup>4</sup>, Xiaowen Chao<sup>1</sup>, Lirong Wu<sup>1</sup>, Jie Wang<sup>3</sup>, Liang Cui<sup>2</sup>, Tao Sun<sup>1</sup>, Mengci Li<sup>1</sup>, Ying Wang<sup>2</sup>, Yihui Guan<sup>3</sup>, Xiaojiao Zheng<sup>1</sup>, Zhenxing Ren<sup>1</sup>, Yuhuai Guo<sup>1</sup>, Lu Wang<sup>5</sup>, Kejun Zhou<sup>4</sup>, Aihua Zhao<sup>1</sup>, Qihao Guo<sup>2\*</sup>, Fang Xie<sup>3\*</sup>, Wei Jia<sup>1,5\*</sup>

1 Center for Translational Medicine and Shanghai Key Laboratory of Diabetes Mellitus, Shanghai Sixth People's Hospital Affiliated to Shanghai Jiao Tong University School of Medicine, Shanghai 200233, China

2 Department of Gerontology, Shanghai Sixth People's Hospital Affiliated to Shanghai Jiao Tong University School of Medicine, Shanghai, 200233, China.

3 Department of Nuclear Medicine & PET Center, Huashan Hospital, Fudan University, Shanghai, 200040, China

4 Human Metabolomics Institute, Inc., Shenzhen 518109, China

5 School of Chinese Medicine, Hong Kong Baptist University, Kowloon Tong 999077, Hong Kong, China.

# Contents

|                                                                                                                                                 |    |
|-------------------------------------------------------------------------------------------------------------------------------------------------|----|
| Table S1. Quantified metabolites .....                                                                                                          | 3  |
| Figure S1. Fold changes of concentration summations of metabolite types in SCD, MCI, and AD relative to CN. ....                                | 9  |
| Table S2. The computational formula and biological meaning of 34 extended metabolic features. ....                                              | 10 |
| Figure S2. Associations of 13 metabolic features and cognition scores in stratified participants. ....                                          | 12 |
| Table S3. Characteristics of age-matched sub-population.....                                                                                    | 13 |
| Figure S3. Performances of the 13 identified features in age-matched sub-populations. ....                                                      | 14 |
| Table S4. Metabolite measurement information of 8 validation data sets. ....                                                                    | 16 |
| Table S5. Population characteristics of 8 validation data sets. ....                                                                            | 17 |
| Figure S4 The number of overlapped participants between ADNI studies. ....                                                                      | 19 |
| Figure S5. The meta-analysis forest plots of identified features on their standardized mean differences of CN and AD. ....                      | 20 |
| Figure S6. The meta-analysis forest plots of identified features on their Partial Spearman correlation coefficients with global cognition. .... | 25 |
| Methods .....                                                                                                                                   | 30 |
| Discussion.....                                                                                                                                 | 35 |
| References.....                                                                                                                                 | 37 |

Table S1. Quantified metabolites

| index | name                     | HMDB        | type                         |
|-------|--------------------------|-------------|------------------------------|
| 1     | 1-Methylhistidine        | HMDB0000001 | Amino Acids                  |
| 2     | Beta-Alanine             | HMDB0000056 | Amino Acids                  |
| 3     | Creatine                 | HMDB0000064 | Amino Acids                  |
| 4     | L-Tyrosine               | HMDB0000158 | Amino Acids                  |
| 5     | L-Phenylalanine          | HMDB0000159 | Amino Acids                  |
| 6     | L-Alanine                | HMDB0000161 | Amino Acids                  |
| 7     | L-Proline                | HMDB0000162 | Amino Acids                  |
| 8     | L-threonine              | HMDB0000167 | Amino Acids                  |
| 9     | L-Asparagine             | HMDB0000168 | Amino Acids                  |
| 10    | L-Histidine              | HMDB0000177 | Amino Acids                  |
| 11    | L-Lysine                 | HMDB0000182 | Amino Acids                  |
| 12    | L-Serine                 | HMDB0000187 | Amino Acids                  |
| 13    | Ornithine                | HMDB0000214 | Amino Acids                  |
| 14    | Sarcosine                | HMDB0000271 | Amino Acids                  |
| 15    | L-Arginine               | HMDB0000517 | Amino Acids                  |
| 16    | glutamine                | HMDB0000641 | Amino Acids                  |
| 17    | Homocitrulline           | HMDB0000679 | Amino Acids                  |
| 18    | L-Methionine             | HMDB0000696 | Amino Acids                  |
| 19    | L-Pipecolic acid         | HMDB0000716 | Amino Acids                  |
| 20    | 4-Hydroxyproline         | HMDB0000725 | Amino Acids                  |
| 21    | Citrulline               | HMDB0000904 | Amino Acids                  |
| 22    | L-Tryptophan             | HMDB0000929 | Amino Acids                  |
| 23    | 5-Aminolevulinic acid    | HMDB0001149 | Amino Acids                  |
| 24    | Methylcysteine           | HMDB0002108 | Amino Acids                  |
| 25    | N-Acetylserine           | HMDB0002931 | Amino Acids                  |
| 26    | 3-Aminoisobutanoic acid  | HMDB0003911 | Amino Acids                  |
| 27    | Phenylacetylglutamine    | HMDB0006344 | Amino Acids                  |
| 28    | L-Isoleucine             | HMDB0000172 | BCAAs                        |
| 29    | L-Leucine                | HMDB0000687 | BCAAs                        |
| 30    | L-Valine                 | HMDB0000883 | BCAAs                        |
| 31    | glutamate                | HMDB0000148 | excitatory neurotransmitters |
| 32    | L-Aspartic acid          | HMDB0000191 | excitatory neurotransmitters |
| 33    | Pyroglutamic acid        | HMDB0000267 | excitatory neurotransmitters |
| 34    | N-Acetyl-L-aspartic acid | HMDB0000812 | excitatory neurotransmitters |
| 35    | Dimethylglycine          | HMDB0000092 | inhibitory neurotransmitters |

|    |                         |                 |                                 |
|----|-------------------------|-----------------|---------------------------------|
| 36 | GABA                    | HMDB0000112     | inhibitory<br>neurotransmitters |
| 37 | Glycine                 | HMDB0000123     | inhibitory<br>neurotransmitters |
| 38 | Acetylglycine           | HMDB0000532     | inhibitory<br>neurotransmitters |
| 39 | 2-Phenylglycine         | HMDB0002210     | inhibitory<br>neurotransmitters |
| 40 | TCA                     | HMDB0000036     | Bile Acids                      |
| 41 | GCA                     | HMDB0000138     | Bile Acids                      |
| 42 | 7_DHCA                  | HMDB0000391     | Bile Acids                      |
| 43 | CDCA                    | HMDB0000518     | Bile Acids                      |
| 44 | CA                      | HMDB0000619     | Bile Acids                      |
| 45 | DCA                     | HMDB0000626     | Bile Acids                      |
| 46 | GDCA                    | HMDB0000631     | Bile Acids                      |
| 47 | GCDCA                   | HMDB0000637     | Bile Acids                      |
| 48 | isoDCA                  | HMDB0000686     | Bile Acids                      |
| 49 | GLCA                    | HMDB0000698     | Bile Acids                      |
| 50 | GUDCA                   | HMDB0000708     | Bile Acids                      |
| 51 | HCA                     | HMDB0000760     | Bile Acids                      |
| 52 | LCA                     | HMDB0000761     | Bile Acids                      |
| 53 | TUDCA                   | HMDB0000874     | Bile Acids                      |
| 54 | TDCA                    | HMDB0000896     | Bile Acids                      |
| 55 | UDCA                    | HMDB0000946     | Bile Acids                      |
| 56 | TCDCa                   | HMDB0000951     | Bile Acids                      |
| 57 | GHCA                    | HMDB0240607     | Bile Acids                      |
| 58 | NorCA                   | Norcholeic acid | Bile Acids                      |
| 59 | Glyceric acid           | HMDB0000139     | Carbohydrates                   |
| 60 | Gluconolactone          | HMDB0000150     | Carbohydrates                   |
| 61 | N-Acetylneuraminic acid | HMDB0000230     | Carbohydrates                   |
| 62 | Galactonic acid         | HMDB0000565     | Carbohydrates                   |
| 63 | Erythronic acid         | HMDB0000613     | Carbohydrates                   |
| 64 | Glucaric acid           | HMDB0000663     | Carbohydrates                   |
| 65 | Ribonic acid            | HMDB0000867     | Carbohydrates                   |
| 66 | Threonic acid           | HMDB0000943     | Carbohydrates                   |
| 67 | Tartaric acid           | HMDB0000956     | Carbohydrates                   |
| 68 | D-Xylose                | HMDB0000098     | sugars                          |
| 69 | D-Glucose               | HMDB0000122     | sugars                          |
| 70 | D-Maltose               | HMDB0000163     | sugars                          |
| 71 | D-Fructose              | HMDB0000660     | sugars                          |
| 72 | Rhamnose                | HMDB0000849     | sugars                          |
| 73 | D-Xylulose              | HMDB0001644     | sugars                          |
| 74 | L-Carnitine             | HMDB0000062     | Carnitines                      |
| 75 | L-Acetylcarnitine       | HMDB0000201     | Carnitines                      |

|     |                                |                       |             |
|-----|--------------------------------|-----------------------|-------------|
| 76  | Palmitoylcarnitine             | HMDB0000222           | Carnitines  |
| 77  | 2-Methylbutyrylcarnitine       | HMDB0000378           | Carnitines  |
| 78  | Decanoylcarnitine              | HMDB0000651           | Carnitines  |
| 79  | Isovalerylcarnitine            | HMDB0000688           | Carnitines  |
| 80  | Hexanoylcarnitine              | HMDB0000756           | Carnitines  |
| 81  | Octanoylcarnitine              | HMDB0000791           | Carnitines  |
| 82  | Propionylcarnitine             | HMDB0000824           | Carnitines  |
| 83  | Malonylcarnitine               | HMDB0002095           | Carnitines  |
| 84  | Dodecanoylcarnitine            | HMDB0002250           | Carnitines  |
| 85  | Oleoylecarnitine               | HMDB0005065           | Carnitines  |
| 86  | Tetradecanoylcarnitine         | HMDB0005066           | Carnitines  |
| 87  | Linoleyl carnitine             | HMDB0006469           | Carnitines  |
| 88  | Valerylcarnitine               | HMDB0013128           | Carnitines  |
| 89  | Glutaryl carnitine             | HMDB0013130           | Carnitines  |
| 90  | Methylmalonylcarnitine         | HMDB0013133           | Carnitines  |
| 91  | 3-Hydroxyisovalerylcarnitine   | HMDB0061189           | Carnitines  |
| 92  | O-Adipoylcarnitine             | HMDB0061677           | Carnitines  |
| 93  | 4-Methylhexanoic acid          | 4-Methylhexanoic acid | Fatty Acids |
| 94  | Oleic acid                     | HMDB0000207           | Fatty Acids |
| 95  | 2-Hydroxy-3-methylbutyric acid | HMDB0000407           | Fatty Acids |
| 96  | Citramalic acid                | HMDB0000426           | Fatty Acids |
| 97  | Adipic acid                    | HMDB0000448           | Fatty Acids |
| 98  | Capric acid                    | HMDB0000511           | Fatty Acids |
| 99  | 5Z-Dodecenoic acid             | HMDB0000529           | Fatty Acids |
| 100 | 3-Methyladipic acid            | HMDB0000555           | Fatty Acids |
| 101 | Dodecanoic acid                | HMDB0000638           | Fatty Acids |
| 102 | Heptanoic acid                 | HMDB0000666           | Fatty Acids |
| 103 | Linoleic acid                  | HMDB0000673           | Fatty Acids |
| 104 | Azelaic acid                   | HMDB0000784           | Fatty Acids |
| 105 | Sebacic acid                   | HMDB0000792           | Fatty Acids |
| 106 | Myristic acid                  | HMDB0000806           | Fatty Acids |
| 107 | Pimelic acid                   | HMDB0000857           | Fatty Acids |
| 108 | Suberic acid                   | HMDB0000893           | Fatty Acids |
| 109 | Tridecanoic acid               | HMDB0000910           | Fatty Acids |
| 110 | Undecanoic acid                | HMDB0000947           | Fatty Acids |
| 111 | Arachidonic acid               | HMDB0001043           | Fatty Acids |
| 112 | Alpha-Linolenic acid           | HMDB0001388           | Fatty Acids |
| 113 | 2-Hydroxycaproic acid          | HMDB0001624           | Fatty Acids |
| 114 | Methylsuccinic acid            | HMDB0001844           | Fatty Acids |

|     |                                  |             |               |
|-----|----------------------------------|-------------|---------------|
| 115 | Docosapentaenoic acid<br>(22n-6) | HMDB0001976 | Fatty Acids   |
| 116 | 2-Hydroxy-2-methylbutyric acid   | HMDB0001987 | Fatty Acids   |
| 117 | Eicosapentaenoic acid            | HMDB0001999 | Fatty Acids   |
| 118 | Myristoleic acid                 | HMDB0002000 | Fatty Acids   |
| 119 | 2,2-Dimethylsuccinic acid        | HMDB0002074 | Fatty Acids   |
| 120 | Docosahexaenoic acid             | HMDB0002183 | Fatty Acids   |
| 121 | Adrenic acid                     | HMDB0002226 | Fatty Acids   |
| 122 | Dihomo-gamma-linolenic acid      | HMDB0002925 | Fatty Acids   |
| 123 | Gamma-Linolenic acid             | HMDB0003073 | Fatty Acids   |
| 124 | Palmitoleic acid                 | HMDB0003229 | Fatty Acids   |
| 125 | Docosapentaenoic acid<br>(22n-3) | HMDB0006528 | Fatty Acids   |
| 126 | Ricinoleic acid                  | HMDB0034297 | Fatty Acids   |
| 127 | 12-hydroxystearic acid           | HMDB0061706 | Fatty Acids   |
| 128 | 9E-tetradecenoic acid            | HMDB0062248 | Fatty Acids   |
| 129 | Caprylic acid                    | HMDB0000482 | Fatty Acids   |
| 130 | 2-Hydroxybutyric acid            | HMDB0000008 | Organic Acids |
| 131 | Alpha-ketoisovaleric acid        | HMDB0000019 | Organic Acids |
| 132 | cis-Aconitic acid                | HMDB0000072 | Organic Acids |
| 133 | Citric acid                      | HMDB0000094 | Organic Acids |
| 134 | Glycolic acid                    | HMDB0000115 | Organic Acids |
| 135 | Guanidoacetic acid               | HMDB0000128 | Organic Acids |
| 136 | Fumaric acid                     | HMDB0000134 | Organic Acids |
| 137 | L-Malic acid                     | HMDB0000156 | Organic Acids |
| 138 | Maleic acid                      | HMDB0000176 | Organic Acids |
| 139 | L-Lactic acid                    | HMDB0000190 | Organic Acids |
| 140 | Isocitric acid                   | HMDB0000193 | Organic Acids |
| 141 | Methylmalonic acid               | HMDB0000202 | Organic Acids |
| 142 | Oxoglutaric acid                 | HMDB0000208 | Organic Acids |
| 143 | Oxoadipic acid                   | HMDB0000225 | Organic Acids |
| 144 | Pyruvic acid                     | HMDB0000243 | Organic Acids |
| 145 | Succinic acid                    | HMDB0000254 | Organic Acids |
| 146 | 3-Hydroxybutyric acid            | HMDB0000357 | Organic Acids |
| 147 | 3-Methyl-2-oxovaleric acid       | HMDB0000491 | Organic Acids |
| 148 | D-2-Hydroxyglutaric acid         | HMDB0000606 | Organic Acids |
| 149 | Glutaconic acid                  | HMDB0000620 | Organic Acids |
| 150 | Glutaric acid                    | HMDB0000661 | Organic Acids |

|     |                                             |             |               |
|-----|---------------------------------------------|-------------|---------------|
| 151 | Malonic acid                                | HMDB0000691 | Organic Acids |
| 152 | Hydroxypropionic acid                       | HMDB0000700 | Organic Acids |
| 153 | Alpha-Hydroxyisobutyric acid                | HMDB0000729 | Organic Acids |
| 154 | Benzoic acid                                | HMDB0001870 | Organic Acids |
| 155 | Oxalic acid                                 | HMDB0002329 | Organic Acids |
| 156 | Quinic acid                                 | HMDB0003072 | Organic Acids |
| 157 | Ketoleucine                                 | HMDB0000695 | Organic Acids |
| 158 | p-Hydroxyphenylacetic acid                  | HMDB0000020 | others        |
| 159 | Homovanillic acid                           | HMDB0000118 | others        |
| 160 | Indoleacetic acid                           | HMDB0000197 | others        |
| 161 | Phenylpyruvic acid                          | HMDB0000205 | others        |
| 162 | Phenylacetic acid                           | HMDB0000209 | others        |
| 163 | Ortho-Hydroxyphenylacetic acid              | HMDB0000669 | others        |
| 164 | Indolelactic acid                           | HMDB0000671 | others        |
| 165 | Mandelic acid                               | HMDB0000703 | others        |
| 166 | Hippuric acid                               | HMDB0000714 | others        |
| 167 | Glycylproline                               | HMDB0000721 | others        |
| 168 | Hydroxyphenyllactic acid                    | HMDB0000755 | others        |
| 169 | Hydrocinnamic acid                          | HMDB0000764 | others        |
| 170 | Phenyllactic acid                           | HMDB0000779 | others        |
| 171 | Salicyluric acid                            | HMDB0000840 | others        |
| 172 | Phthalic acid                               | HMDB0002107 | others        |
| 173 | Imidazolepropionic acid                     | HMDB0002271 | others        |
| 174 | 3-Indolepropionic acid                      | HMDB0002302 | others        |
| 175 | 3-(3-Hydroxyphenyl)-3-hydroxypropanoic acid | HMDB0002643 | others        |
| 176 | N-Methylnicotinamide                        | HMDB0003152 | others        |
| 177 | gamma-Glutamylalanine                       | HMDB0006248 | others        |
| 178 | 2-Phenylpropionate                          | HMDB0011743 | others        |
| 179 | Indolepyruvate                              | HMDB0060484 | others        |
| 180 | Butyric acid                                | HMDB0000039 | SCFAs         |
| 181 | Acetic acid                                 | HMDB0000042 | SCFAs         |
| 182 | Propionic acid                              | HMDB0000237 | SCFAs         |
| 183 | Caproic acid                                | HMDB0000535 | SCFAs         |
| 184 | Isocaproic acid                             | HMDB0000689 | SCFAs         |
| 185 | Isovaleric acid                             | HMDB0000718 | SCFAs         |
| 186 | 3-Hydroxyisovaleric acid                    | HMDB0000754 | SCFAs         |

|     |                        |             |       |
|-----|------------------------|-------------|-------|
| 187 | Valeric acid           | HMDB0000892 | SCFAs |
| 188 | Isobutyric acid        | HMDB0001873 | SCFAs |
| 189 | Ethylmethylacetic acid | HMDB0002176 | SCFAs |

---

BCAA: branched-chain amino acid;

SCFA: short-chain fatty acid

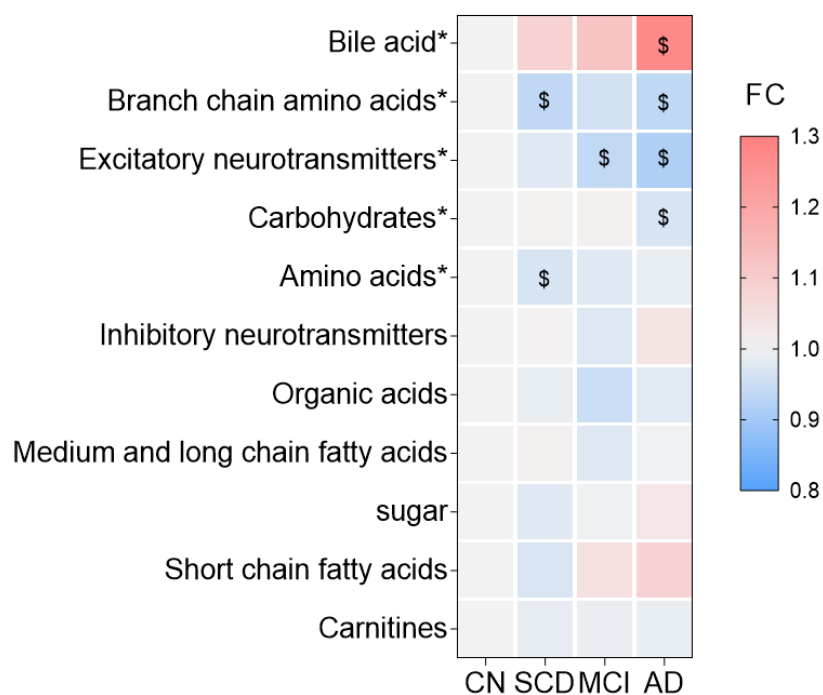

Figure S1. Fold changes of concentration summations of metabolite types in SCD, MCI, and AD relative to CN.

\* indicates ANOVA FDR<0.05 comparing NC, SCD, MCI, and AD. \$ indicates dunnett post hoc p<0.05 comparing to CN. All p values are two-sided. Metabolite types are ordered by ANOVA FDR values.

Table S2. The computational formula and biological meaning of 34 extended metabolic features.

| index | name                           | Biological meaning (KEGG K number or computational formula)                                                                                                                                            | type      |
|-------|--------------------------------|--------------------------------------------------------------------------------------------------------------------------------------------------------------------------------------------------------|-----------|
| 1     | BCAAs                          | concentration of total BCAAs (valine+leucine+isoleucine)                                                                                                                                               | summation |
| 2     | glutamate/GABA                 | activity of glutamate decarboxylase (K01580)                                                                                                                                                           | ratio     |
| 3     | glutamate/glutamine            | activity of glutamine synthetase, glutamate synthase (NADH), and glutaminase (K01915, K00264, and K01425)                                                                                              | ratio     |
| 4     | aspartate/N-acetyl-L-aspartate | activity of aspartate N-acetyltransferase and aspartoacylase (K18309 and K01437)                                                                                                                       | ratio     |
| 5     | aspartate/asparagine           | activity of asparagine synthase (glutamine-hydrolysing), aspartate--ammonia ligase, and glutamin-(asparagin-)ase (K01953, K01914, K05597)                                                              | ratio     |
| 6     | glutamate/oxoglutarate         | activity of glutamate synthase (NADPH) large chain (K00265)                                                                                                                                            | ratio     |
| 7     | TBA                            | total BAs (concentration summation of 19 BAs), plasma BA pool                                                                                                                                          | summation |
| 8     | ConBA                          | total conjugated BAs (GCA+TCA+GCDCA+TCDCA+GDCA+TDCA+GUDCA+TUDCA+GLCA), BA pool structure                                                                                                               | summation |
| 9     | UnconBA                        | total unconjugated BAs (CA+CDCA+DCA+UDCA+LCA), BA pool structure                                                                                                                                       | summation |
| 10    | PriBA                          | total primary BAs (CA+CDCA+GCA+GCDCA+TCA+TCDCA), BA pool structure                                                                                                                                     | summation |
| 11    | SecBA                          | total secondary BAs (DCA+UDCA+LCA+GDCA+TDCA+GUDCA+TUDCA+GLCA), BA pool structure                                                                                                                       | summation |
| 12    | Pri/Sec                        | ratio of primary and secondary BAs, BA pool structure                                                                                                                                                  | ratio     |
| 13    | Con/Uncon                      | ratio of conjugated and unconjugated BAs, BA pool structure                                                                                                                                            | ratio     |
| 14    | CA+CDCA                        | total primary unconjugated BAs, BA pool structure                                                                                                                                                      | summation |
| 15    | CA/CDCA                        | ratio of 2 primary unconjugated BAs, balance of classical and alternative pathway of BA metabolism                                                                                                     | ratio     |
| 16    | TCA/CDCA                       | liver enzymatic (including the bile acid -CoA: amino acid N-acyltransferase, K00659 and sterol 12- $\alpha$ -hydroxylase, K07431) activities and gut microbiome function (bile salt hydrolase, K01442) | ratio     |
| 17    | GCA/CDCA                       | liver enzymatic (including the bile acid -CoA: amino acid N-acyltransferase, K00659 and sterol 12- $\alpha$ -                                                                                          | ratio     |

|    |            |                                                                                                                                                                                                                                  |       |
|----|------------|----------------------------------------------------------------------------------------------------------------------------------------------------------------------------------------------------------------------------------|-------|
|    |            | hydroxylase, K07431) activities and gut microbiome function (bile salt hydrolase, K01442)                                                                                                                                        |       |
| 18 | DCA/CA     | gut microbiome function (bile acid 7-alpha hydroxylation including K15868, K15870, K15872, K15871 and K15873)                                                                                                                    | ratio |
| 19 | GDCA/CA    | liver enzymatic (bile acid -CoA: amino acid N-acyltransferase, K00659) activities and gut microbiome function (bile salt hydrolase, K01442; bile acid 7-alpha hydroxylation including K15868, K15870, K15872, K15871 and K15873) | ratio |
| 20 | TDCA/CA    | liver enzymatic (bile acid -CoA: amino acid N-acyltransferase, K00659) activities and gut microbiome function (bile salt hydrolase, K01442; bile acid 7-alpha hydroxylation including K15868, K15870, K15872, K15871 and K15873) | ratio |
| 21 | LCA/CDCA   | gut microbiome function (bile acid 7-alpha hydroxylation including K15868, K15870, K15872, K15871 and K15873)                                                                                                                    | ratio |
| 22 | GLCA/CDCA  | liver enzymatic (bile acid -CoA: amino acid N-acyltransferase, K00659) activities and gut microbiome function (bile salt hydrolase, K01442; bile acid 7-alpha hydroxylation including K15868, K15870, K15872, K15871 and K15873) | ratio |
| 23 | UDCA/CDCA  | gut microbiome function (7alpha/beta-HSDH, K00076/K23231)                                                                                                                                                                        | ratio |
| 24 | GUDCA/CDCA | liver enzymatic (bile acid -CoA: amino acid N-acyltransferase, K00659) activities and gut microbiome function (bile salt hydrolase, K01442; 7alpha/beta-HSDH, K00076/K23231)                                                     | ratio |
| 25 | TUDCA/CDCA | liver enzymatic (bile acid -CoA: amino acid N-acyltransferase, K00659) activities and gut microbiome function (bile salt hydrolase, K01442; 7alpha/beta-HSDH, K00076/K23231)                                                     | ratio |
| 26 | GLCA/LCA   | gut microbiome function (bile salt hydrolase, K01442)                                                                                                                                                                            | ratio |
| 27 | TCA/CA     | gut microbiome function (bile salt hydrolase, K01442)                                                                                                                                                                            | ratio |
| 28 | TCDC/CDCA  | gut microbiome function (bile salt hydrolase, K01442)                                                                                                                                                                            | ratio |
| 29 | TDCA/DCA   | gut microbiome function (bile salt hydrolase, K01442)                                                                                                                                                                            | ratio |
| 30 | TUDCA/UDCA | gut microbiome function (bile salt hydrolase, K01442)                                                                                                                                                                            | ratio |
| 31 | GCA/CA     | gut microbiome function (bile salt hydrolase, K01442)                                                                                                                                                                            | ratio |
| 32 | GCDCA/CDCA | gut microbiome function (bile salt hydrolase, K01442)                                                                                                                                                                            | ratio |
| 33 | GDCA/DCA   | gut microbiome function (bile salt hydrolase, K01442)                                                                                                                                                                            | ratio |
| 34 | GUDCA/UDCA | gut microbiome function (bile salt hydrolase, K01442)                                                                                                                                                                            | ratio |

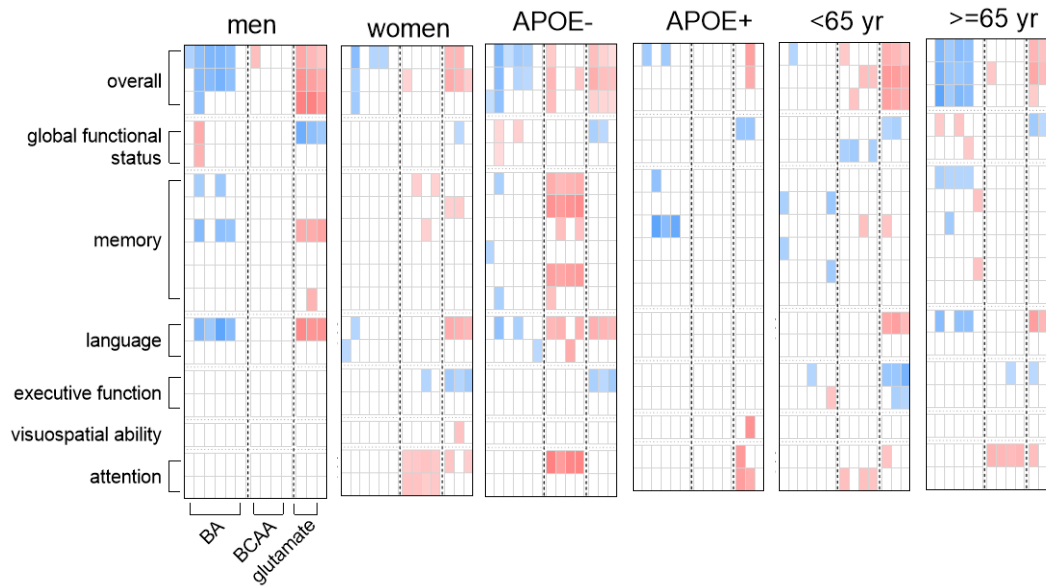

Figure S2. Associations of 13 metabolic features and cognition scores in stratified participants.

Cell color indicates correlation coefficient from Partial Spearman analysis adjusting age, sex, BMI, education year, and APOE-ε4 (red: positive; blue: negative; blank: p>=0.05; two-sided). The order of cognition test scores is consistent with that of main text figure 3b.

Table S3. Characteristics of age-matched sub-population.

| Characteristic                 | ALL (n=991)                                 | CN (n=259)                                 | SCD (n=141)                                | MCI(n=225)                                 | AD (n=366)                                  |
|--------------------------------|---------------------------------------------|--------------------------------------------|--------------------------------------------|--------------------------------------------|---------------------------------------------|
| Age (yr)                       | 69.7+6.5<br>[60,89]<br>69(65,74)            | 69.6+4.6<br>[64,84]<br>69(66,73)           | 69.4+4.7<br>[63,81]<br>69(65,72)           | 69.5+6.0<br>[60,86]<br>69(65,74)           | 69.9+8.4<br>[60,89]<br>70(65,76)            |
| Sex (Men%)                     | 37.8%                                       | 40.2%                                      | 35.5%                                      | 35.7%                                      | 38.4%                                       |
| BMI (kg/m <sup>2</sup> )       | 23.2+3.3*<br>[13.7,33.8]<br>23.1(21.0,25.3) | 23.6+3.2<br>[15.4,33.8]<br>23.5(21.5,25.3) | 23.5+3.1<br>[16.4,30.2]<br>23.5(21.2,25.9) | 23.1+3.4<br>[15.5,33.2]<br>23.0(20.8,25.2) | 22.9+3.4#<br>[13.7,31.1]<br>22.7(20.7,25.1) |
| Education(yr)                  | 11.0+3.2*<br>[6, 22]<br>11(9,13)            | 11.8+3.1<br>[6, 20]<br>12(9,14)            | 11.6+3.2<br>[6,18]<br>12(9,14)             | 11.1+3.0#<br>[6, 22]<br>11(9,13)           | 10.1+3.2#<br>[6, 19]<br>10(7.2,12)          |
| APOE-ε4 carrier % <sup>a</sup> | 31.9%*                                      | 17.4%                                      | 17.7%                                      | 31.6%#                                     | 47.8%#                                      |
| PET acceptance(%) <sup>b</sup> | 28.3%*                                      | 36.3%                                      | 39.7%                                      | 28.4%                                      | 18.0%#                                      |
| Brain Aβ+(%) <sup>c</sup>      | 34.3%                                       | 17.0%                                      | 19.6%                                      | 32.8%                                      | 72.7%                                       |
| MMSE                           | 23.4+6.0*<br>[10,30]<br>26(20,28)           | 28.0+1.7<br>[21,30]<br>28(27,29)           | 27.4+1.8#<br>[21,30]<br>28(26,29)          | 26.3+2.0#<br>[15,30]<br>27(25,28)          | 16.9+4.7#<br>[10,27]<br>18(12,21)           |
| ACEIII-CV                      | 64.9+18.7*<br>[10,97]<br>69(54,79)          | 80.8+7.9<br>[60,97]<br>81.5(76,87)         | 77.1+7.7#<br>[60,95]<br>77(72,82)          | 69.8+8.4#<br>[50,94]<br>71(64,75.2)        | 45.6+14.7#<br>[10,77]<br>48(36,58)          |
| MoCA-BC                        | 22.1+4.9*<br>[10,30]<br>23(19,26)           | 25.6+2.6<br>[20,30]<br>26(24,27)           | 24.0+3.0#<br>[17,29]<br>24(22,27)          | 21.7+3.3#<br>[15,30]<br>22(20,24)          | 15.3+3.3#<br>[10,22]<br>15(13,18)           |

Data are presented as mean+S.D., [minimum, maximum], and median (IQR), or percentage. \* indicates Chi-squared test, analysis of variance, or Kruskal–Wallis test FDR<0.05 when comparing 4 groups (adjusted by Benjamini and Hochberg). # indicates Chi-squared test, student's t-test or Mann-Whitney test FDR<0.05 when compared to CN (adjusted by Benjamini and Hochberg). C-PAS: Chinese Preclinical Alzheimer's Disease Study; CN: cognitively normal; AD: Alzheimer's disease; SCD: subjective cognitive decline; MMSE: Mini-Mental State Examination; ACEIII-CV: Chinese version of Addenbrooke's cognitive examination-III; MoCA-BC: Chinese version of Montreal Cognitive Assessment-Basic. a: the percentage of APOE-ε4 carriers. b: the percentage of the participants that accepted brain PET test. c: the percentage of participants with positive Aβ (defined through visual rating following the guidelines for interpreting amyloid PET) in those underwent the brain AV45-PET scans.

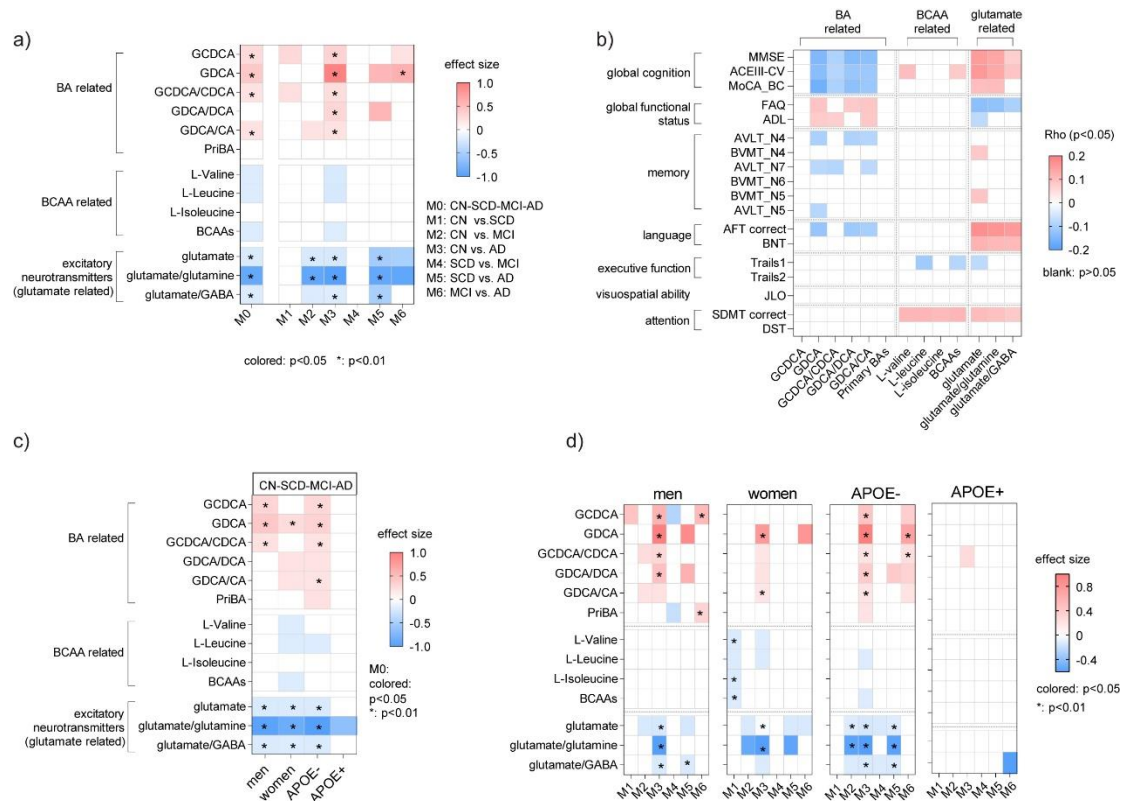

Figure S3. Performances of the 13 identified features in age-matched sub-populations.

a) Effect sizes of the features among four clinical stages (M0) and between every two stages (M1-M6) based on linear regression models (M0) and logistic regression models (M1-M6) respectively. Colored cell indicates  $p < 0.05$  and \* indicates  $p < 0.01$  (two-sided). b) Associations of the features and cognition scores. Cell color indicates correlation coefficient from Partial Spearman analysis (two-sided). c) Effect sizes of the features when differentiating four clinical stages based on linear regression models (M0) in sex and *APOE*- $\epsilon 4$  status stratified populations. Colored cell indicates  $p < 0.05$  and \* indicates  $p < 0.01$  (two-sided). d) Effect sizes of the features when differentiating every two stages in sex and *APOE*- $\epsilon 4$  stratified populations. Colored cell indicates  $p < 0.05$  and \* indicates  $p < 0.01$  (two-sided). Covariates including age, sex, BMI, education year, and *APOE*- $\epsilon 4$  were adjusted in all the above analyses when applicable. GCDCA: Chenodeoxycholic acid glycine conjugate; GDCA: Deoxycholic acid glycine conjugate; GCDCA/CDCA: the ratio of Chenodeoxycholic acid glycine conjugate and Chenodeoxycholic acid; GDCA/DCA: the ratio of Deoxycholic acid glycine conjugate and Deoxycholic acid; GDCA/CA: the ratio of Deoxycholic acid glycine conjugate and Cholic acid; PriBA: concentration summation of primary BAs (CA+CDCA+GCA+TCA+GCDCA+TCDCA); MMSE: Mini-Mental State Examination; ACEIII-CV: Chinese version of Addenbrooke's cognitive examination-III; MoCA-BC: Chinese version of Montreal Cognitive Assessment-Basic; FAQ: Functional Assessment Questionnaire; ADL: Activities of Daily Living; AVLT: Auditory Verbal Learning Test; BVMT-R: Brief Visuospatial Memory Test-Revised; N4: short delayed recall; N5:

long delayed recall; N6/N7: recognition; AFT: Animal Verbal Fluency Test; BNT: Boston Naming Test; STT-A and B: Shape Trail Test Part A and B; JLO: Judgement of Line Orientation; SDMT: Symbol Digit Modalities Test; DST: Digit Span Test.

Table S4. Metabolite measurement information of 8 validation data sets.

| Data set name        | Testing platform or assay                                                                 | Testing team                                   | qualitative / quantitative | ADNI phase   |
|----------------------|-------------------------------------------------------------------------------------------|------------------------------------------------|----------------------------|--------------|
| ADNI-Duke2016        | The AbsoluteIDQ p180 assay                                                                | Duke University                                | quant                      | ADNI1        |
| ADNI-Duke2017        | The AbsoluteIDQ p180 assay                                                                | Duke University                                | quant                      | ADNI2, GO    |
| ADNI-California2017  | Gas chromatography time of flight mass spectrometry (GC-TOF/MS) instrument                | University of California                       | qual                       | ADNI1        |
| ADNI-Hawaii2021      | Ultra-performance liquid chromatography coupled to tandem mass spectrometry (UPLC-MS/MS). | University of Hawaii Cancer Center             | quant                      | ADNI1, GO, 2 |
| ADNI-Nightingale2021 | Nuclear Magnetic Resonance (NMR)                                                          | Nightingale Health's NMR metabolomics platform | quant                      | ADNI1, GO, 2 |
| ADNI-DukeBAs2016     | The Biocrates Bile Acids assay                                                            | Duke University                                | quant                      | ADNI1        |
| ADNI-M2OVEAD2016     | NA                                                                                        | NA                                             | qual                       | NA           |
| Rosmap-Hawaii2017    | Gas chromatography time of flight mass spectrometry (GC-TOF/MS) instrument                | University of Hawaii Cancer Center             | qual                       | NA           |

Table S5. Population characteristics of 8 validation data sets.

|                                        |              |             |              |                      |              |
|----------------------------------------|--------------|-------------|--------------|----------------------|--------------|
| ADNI-Duke2016<br>(serum)               | All (n=818)  | CN (n=232)  | LMCI (n=397) | AD (n=189)           |              |
| Age(yr)                                | 75.23+6.83   | 75.89+5.06  | 74.78+7.45#  | 75.37+7.29           |              |
| Sex(M/F)                               | 469/349*     | 119/113     | 257/140#     | 93/96#               |              |
| Education(yr)                          | 15.53+3.02*  | 16.06+2.84  | 15.62+3.02   | 14.67+3.09#          |              |
| APOE(ε4+)%                             | 37.53%*      | 24.14%      | 40.81%#      | 47.09%#              |              |
| ADAS13                                 | 18.48+9.29*  | 9.4+4.21    | 18.76+6.24#  | 29.02+7.56#          |              |
| ADNI-Duke2017<br>(serum)               | All (n=898)  | CN (n=182)  | SMC (n=104)  | EMCI/LMCI<br>(n=474) | AD (n=138)   |
| Age(yr)                                | 72.46+7.28*  | 73.45+6.32  | 72.18+5.55   | 71.54+7.49#          | 74.55+8.3    |
| Sex(M/F)                               | 472/426*     | 88/94       | 45/59#       | 256/218#             | 83/55#       |
| Education(yr)                          | 16.27+2.62*  | 16.6+2.53   | 16.82+2.55   | 16.18+2.6#           | 15.75+2.77#  |
| APOE(ε4+)%                             | 35.75%*      | 24.73%      | 31.73%       | 37.76%#              | 46.38%#      |
| ADAS13                                 | 15.42+9.65*  | 9.07+4.5    | 8.69+4.09    | 14.76+6.8#           | 31.12+8.54#  |
| ADNI-California2017<br>(serum)         | All (n=820)  | CN (n=232)  | LMCI (n=398) | AD (n=190)           |              |
| Age(yr)                                | 75.23+6.82   | 75.89+5.06  | 74.79+7.44#  | 75.35+7.28           |              |
| Sex(M/F)                               | 470/350*     | 119/113     | 258/140#     | 93/97#               |              |
| Education(yr)                          | 15.53+3.02*  | 16.06+2.84  | 15.62+3.01   | 14.68+3.09#          |              |
| APOE(ε4+)%                             | 37.44%*      | 24.14%      | 40.70%#      | 46.84%#              |              |
| ADAS13                                 | 18.46+9.28*  | 9.4+4.21    | 18.74+6.25#  | 28.97+7.58#          |              |
| ADNI-Hawaii2021<br>(serum)             | All (n=1172) | AD(n=186)   | CN(n=350)    | EMCI/LMCI<br>(n=636) |              |
| Age(yr)                                | 73.90+7.11*  | 75.30+7.70  | 74.82+5.71   | 72.98+7.49#          |              |
| Sex(M/F)                               | 649/523*     | 101/85#     | 181/169      | 367/269#             |              |
| Education(yr)                          | 15.94+2.84*  | 14.98+2.99# | 16.36+2.74   | 15.99+2.79#          |              |
| APOE(ε4+)%                             | 36.95%*      | 25.43%#     | 39.62%       | 49.46%#              |              |
| ADAS13                                 | 16.26+8.99*  | 28.97+7.76# | 9.11+4.21    | 16.48+6.78#          |              |
| ADNI-Nightingale<br>Health2021 (serum) | All (n=1681) | CN (n=404)  | SMC (n=104)  | EMCI/LMCI<br>(n=854) | n=AD (n=319) |
| Age(yr)                                | 73.78+7.21*  | 74.78+5.81  | 72.18+5.55#  | 73.05+7.63#          | 75.30+7.70   |
| Sex(M/F)                               | 917/764*     | 202/202     | 45/59#       | 500/354#             | 170/149#     |
| Education(yr)                          | 15.93+2.83*  | 16.31+2.72  | 16.82+2.55   | 15.93+2.78#          | 14.98+2.99#  |
| APOE(ε4+)%                             | 36.59%*      | 24.26%      | 31.73%       | 39.23%#              | 46.71%#      |
| ADAS13                                 | 16.82+9.62*  | 9.16+4.30   | 8.69+4.09    | 16.53+6.86#          | 28.98+7.76#  |
| ADNI-DukeBAs2016<br>(serum)            | All (n=833)  | AD (n=191)  | CN (n=233)   | EMCI/LMCI<br>(n=399) |              |
| Age(yr)                                | 74.35+10.64* | 75.36+7.26  | 75.94+5.11   | 74.80+7.44#          |              |
| Sex(M/F)                               | 473/360*     | 94/97#      | 120/113      | 259/140#             |              |
| Education(yr)                          | 15.35+3.45*  | 28.97+7.56# | 9.43+4.23    | 15.63+3.02           |              |
| APOE(ε4+)%                             | 36.97%*      | 47.12%#     | 24.03%       | 40.60%#              |              |

|                              |             |             |            |                      |             |
|------------------------------|-------------|-------------|------------|----------------------|-------------|
| ADAS13                       | 18.25+9.43* | 28.97+7.56# | 9.43+4.23  | 18.73+6.25#          |             |
| ADNI-M2OVEAD2016<br>(serum)  | All (n=897) | AD (n=138)  | CN (n=182) | EMCI/LMCI<br>(n=473) | SMC (n=104) |
| Age(yr)                      | 72.47+7.28* | 74.55+8.30  | 73.45+6.32 | 71.55+7.49#          | 72.18+5.55  |
| Sex(M/F)                     | 472/425*    | 83/55#      | 88/94      | 256/217#             | 45/59#      |
| Education(yr)                | 16.27+2.62* | 15.75+2.77# | 16.60+2.53 | 16.18+2.61           | 16.82+2.55  |
| APOE(ε4+)%                   | 35.67%*     | 46.38%#     | 24.73%     | 37.63%#              | 31.73%      |
| ADAS13                       | 15.42+9.66* | 31.12+8.54# | 9.07+4.50  | 14.767+6.806#        | 8.69+4.09   |
| Rosmap-Hawaii2017<br>(serum) | All (n=566) | AD (n=13)   | CN (n=446) | MCI (n=107)          |             |
| Age(yr)                      | 82.28+7.49* | 86.12+8.88# | 81.13+7.38 | 86.65+6.02#          |             |
| Sex(M/F)                     | 447/119     | 10/3#       | 356/90     | 81/26                |             |
| BMI                          | 27.61+5.48* | 24.80+6.71  | 28.01+5.50 | 26.23+4.95#          |             |
| Education(yr)                | 15.68+3.05* | 17.15+3.76  | 15.71+3.06 | 15.26+2.85           |             |
| Global cognition             | 0.19+0.59   | -1.23+0.77  | 0.38+0.44  | -0.41+0.48           |             |
| APOE(ε4+)%                   | 17.49%*     | 30.77%      | 16.14%     | 22.12%               |             |

Data are presented as mean+S.D., percentage, or number. \* indicates Chi-squared test, analysis of variance, or Kruskal–Wallis test FDR<0.05 comparing 4 groups (adjusted by Benjamini and Hochberg). # indicates Chi-squared test, student's t-test or Mann-Whitney test FDR<0.05 compared to CN (adjusted by Benjamini and Hochberg). CN: cognitively normal; AD: Alzheimer's disease; SCD: subjective cognitive decline; MCI: mild cognitive impairment; EMCI: early MCI; LMCI: late MCI; SMC: significant memory concern.

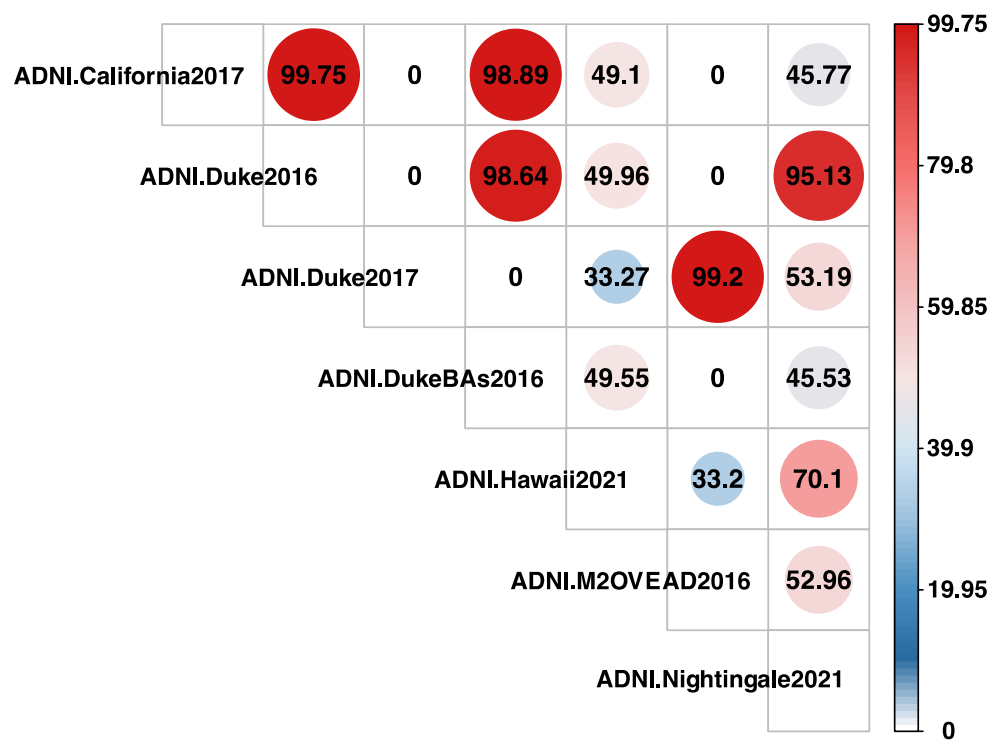

Figure S4 The percentage of overlapping patients with respect to the overall number of unique subjects between both studies (i.e Intersection over Union).

Figure S5. The meta-analysis forest plots of identified features on their standardized mean differences of CN and AD.

GCDCA

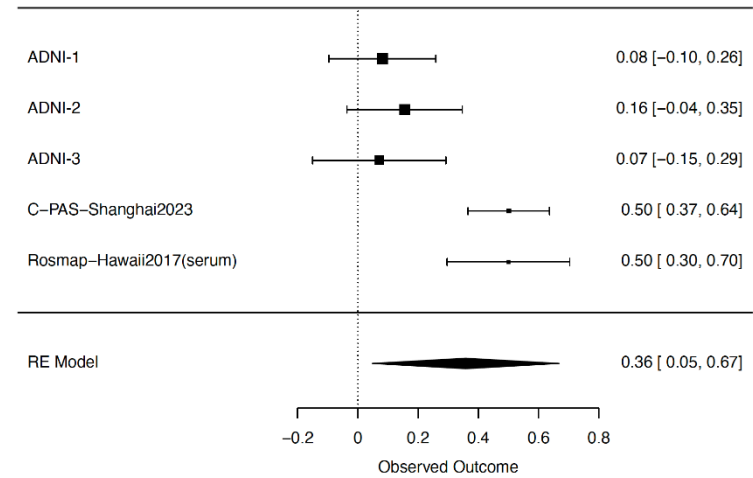

GDCA

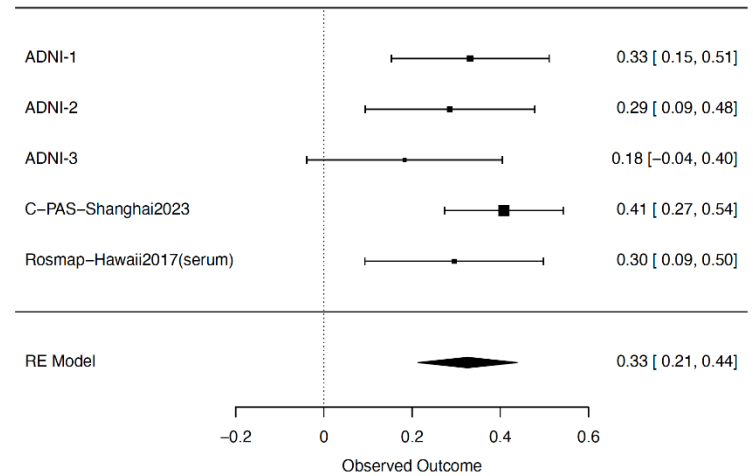

GCDCA/CDCA

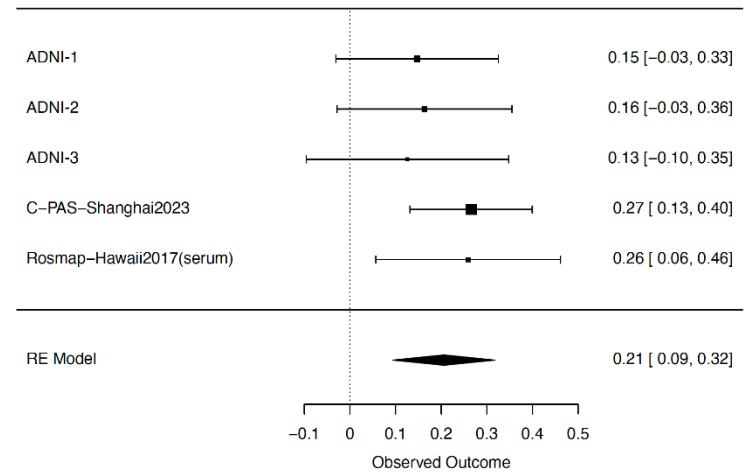

GDCA/DCA

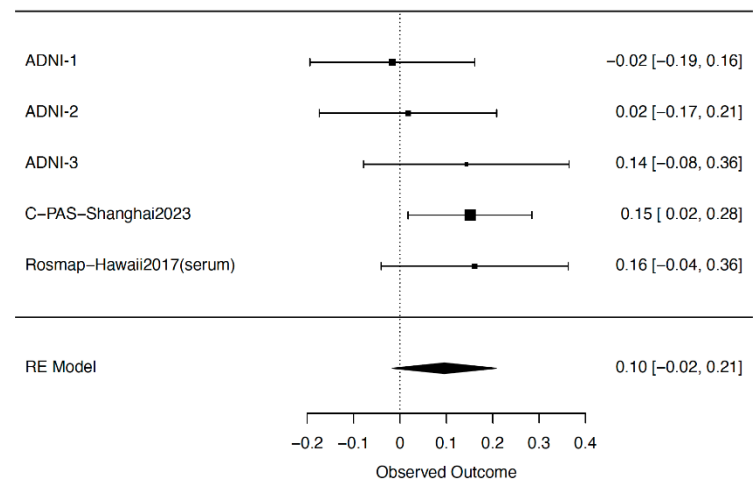

GDCA/CA

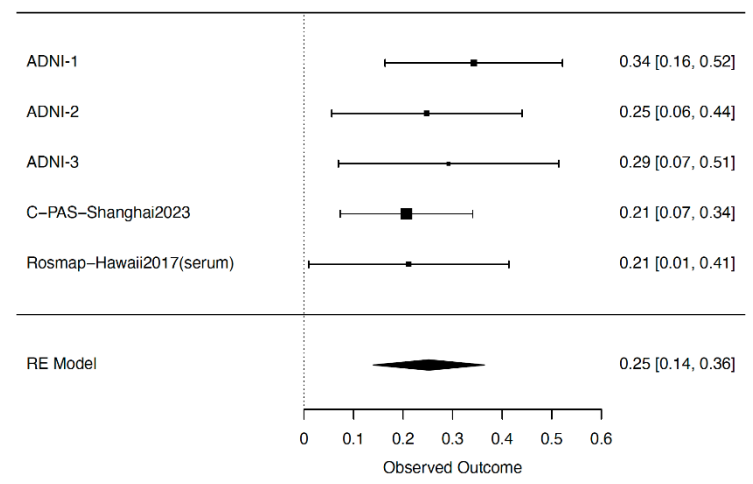

PriBA

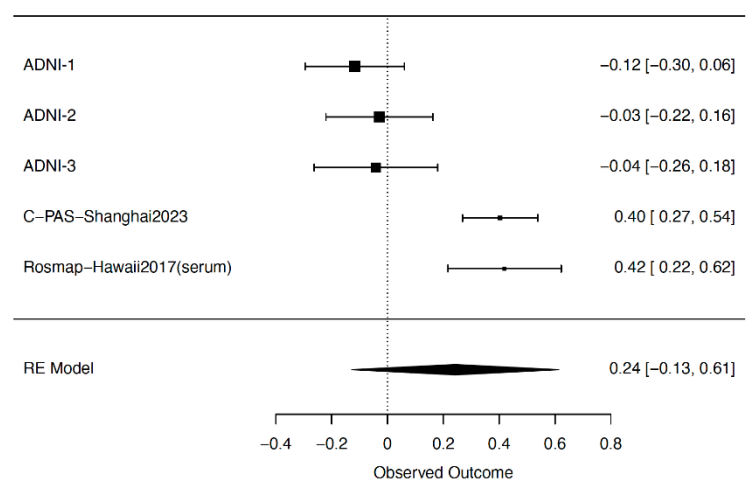

## Valine

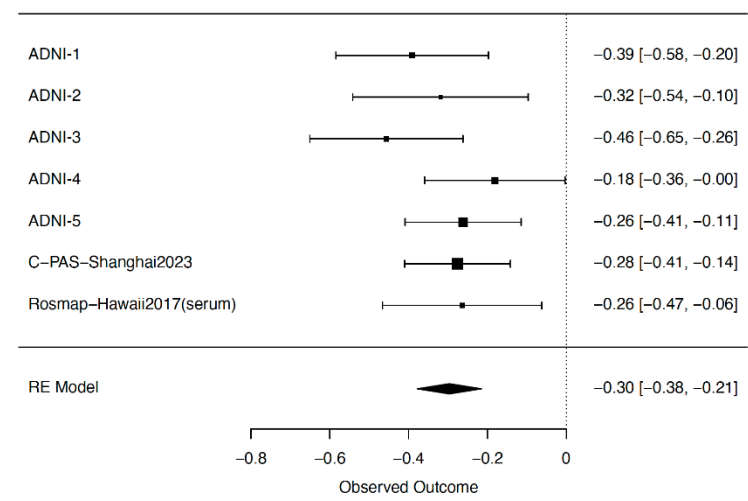

## Leucine

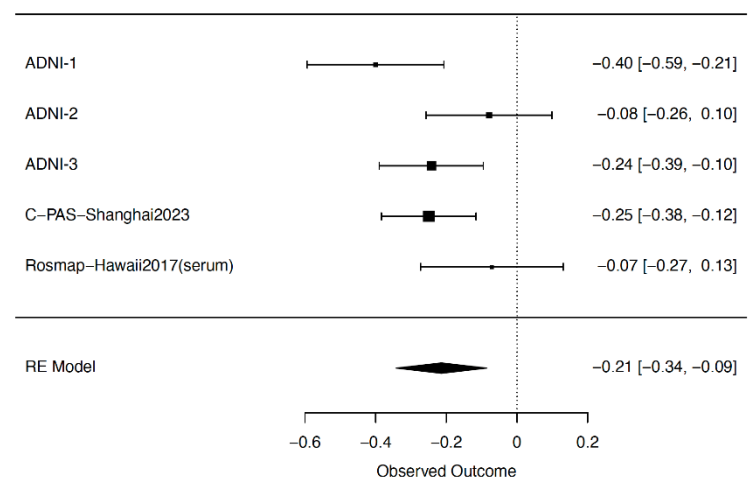

## Isoleucine

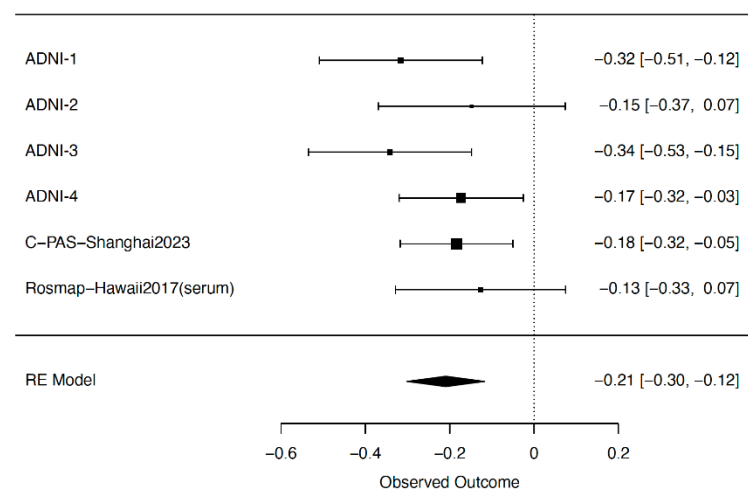

BCAAs

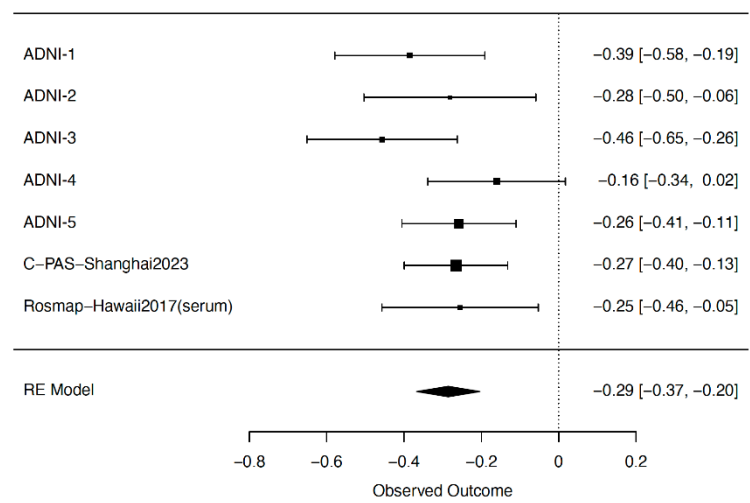

Glutamate

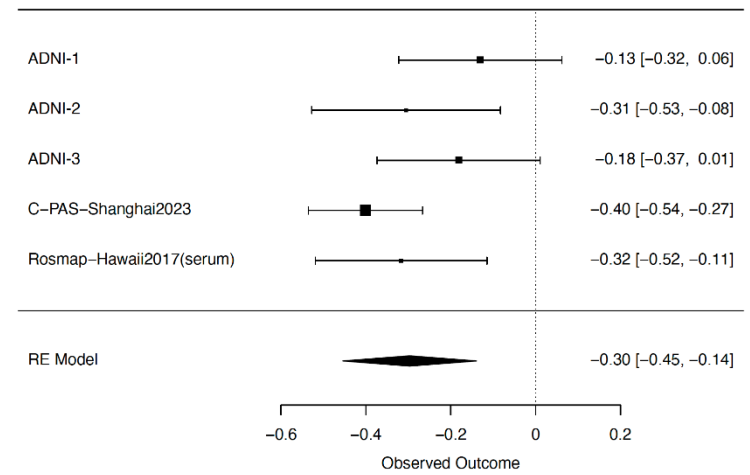

Glutamate/Glutamine

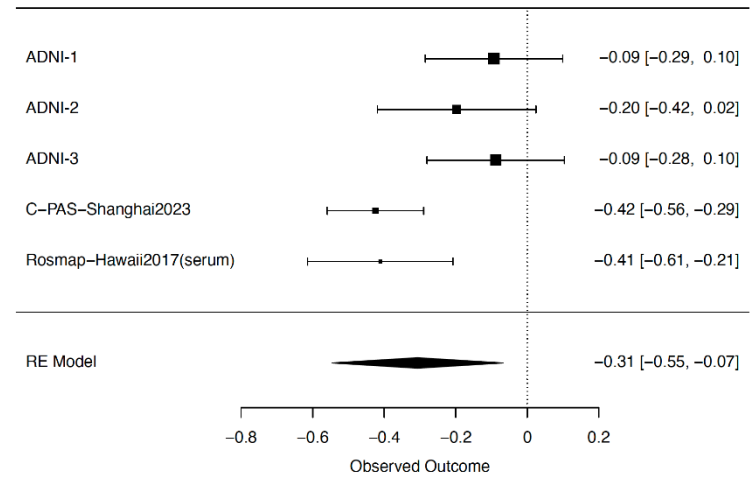

Glutamate/GABA

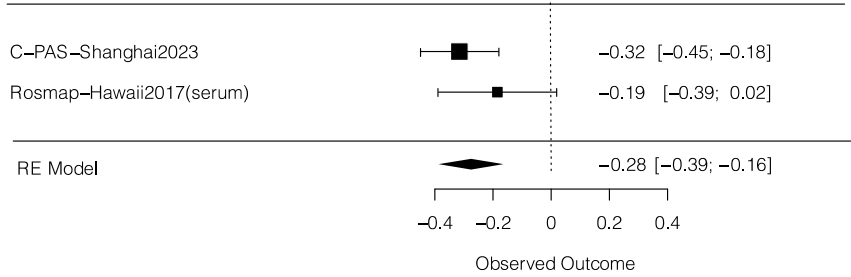

Figure S6. The meta-analysis forest plots of identified features on their Partial Spearman correlation coefficients with global cognition.

GCDCA

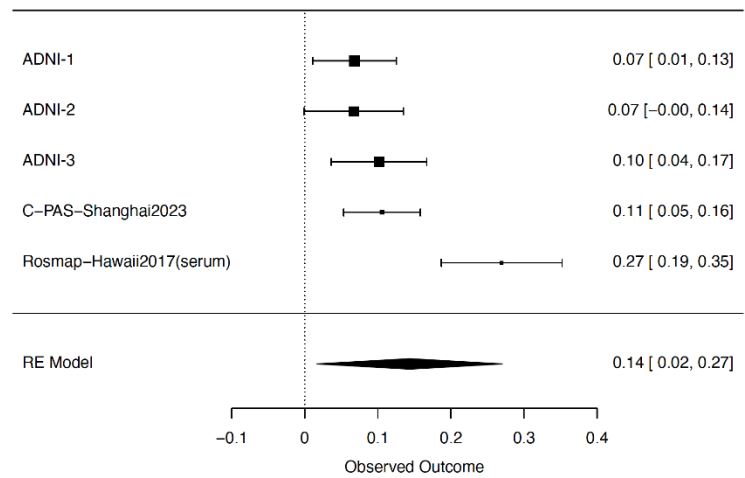

GDCA

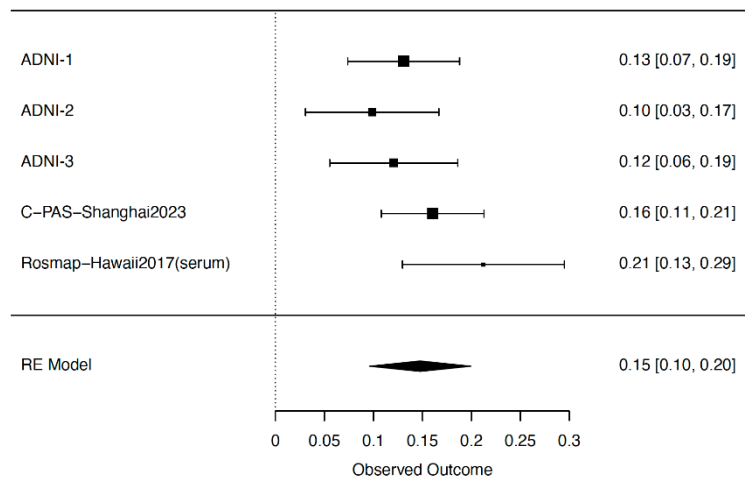

GCDCA/CDCA

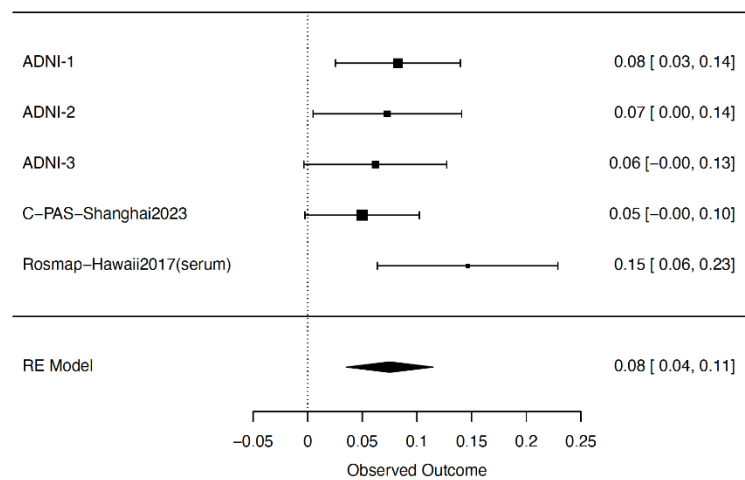

GDCA/DCA

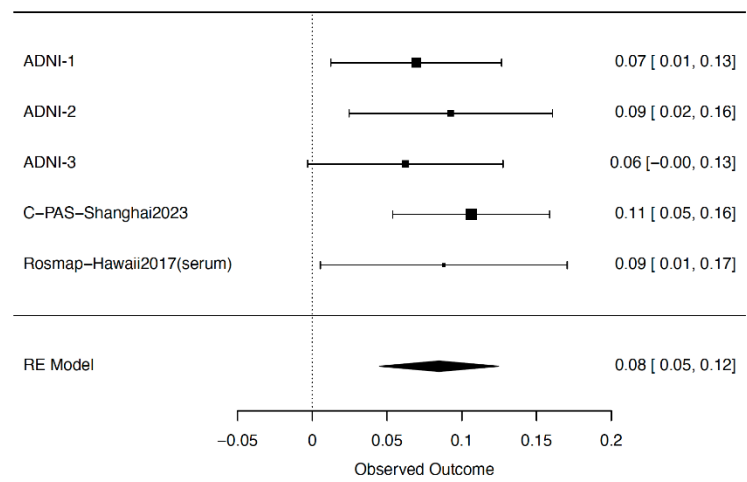

GDCA/CA

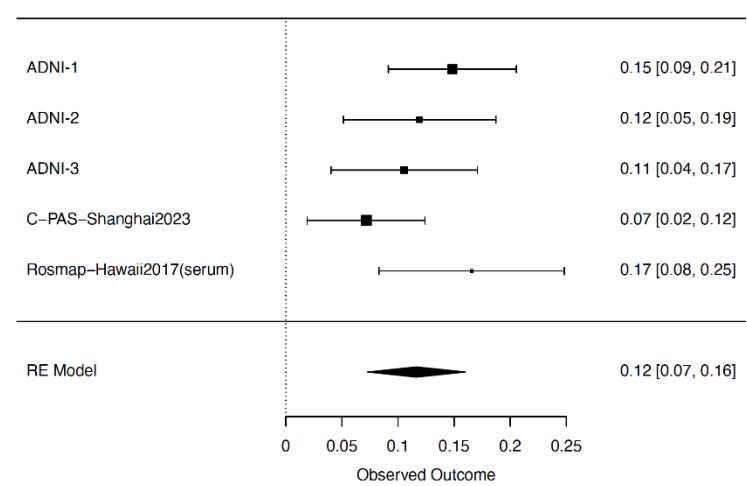

PriBA

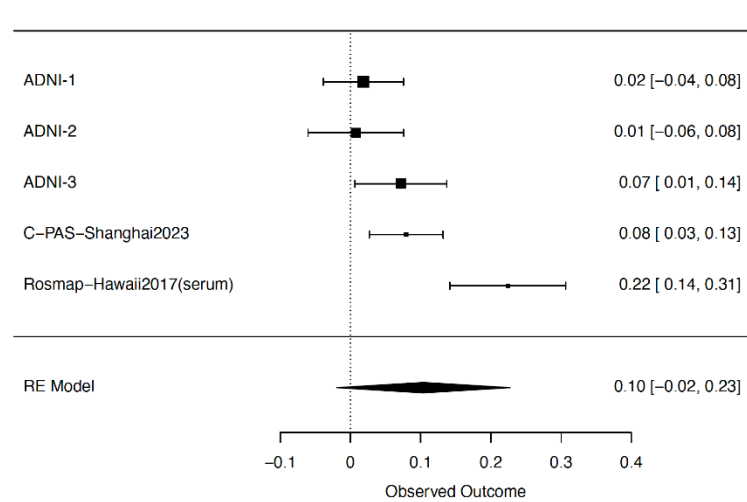

Valine

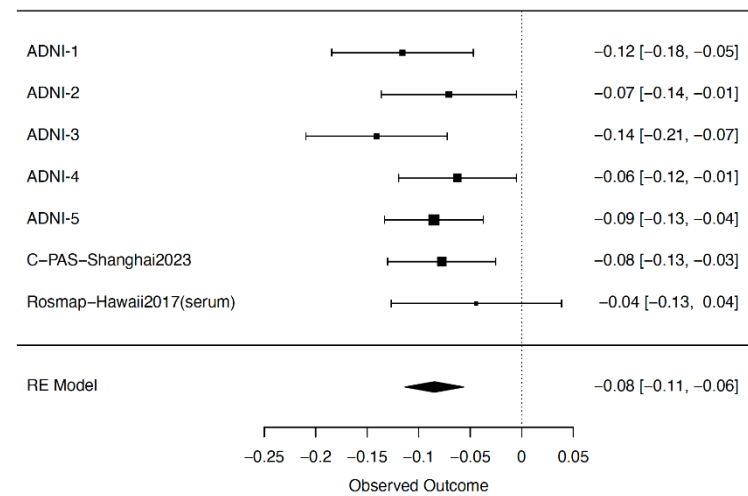

Leucine

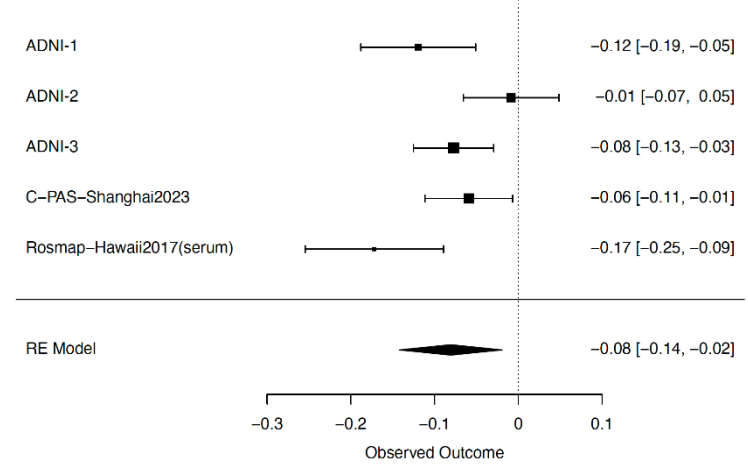

Isoleucine

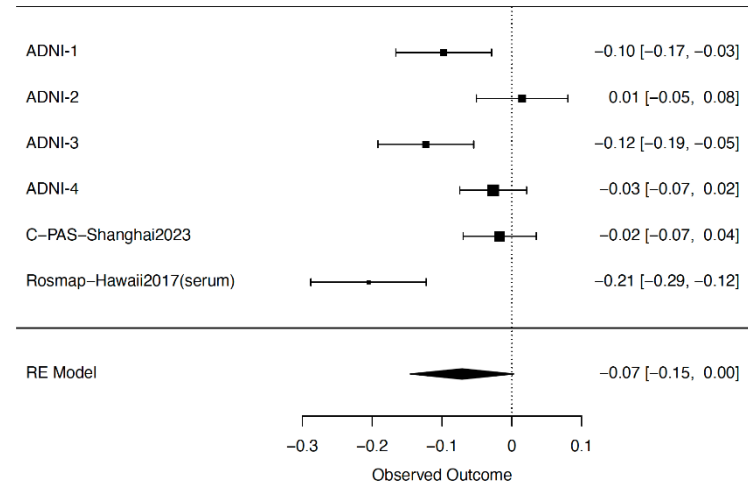

BCAAs

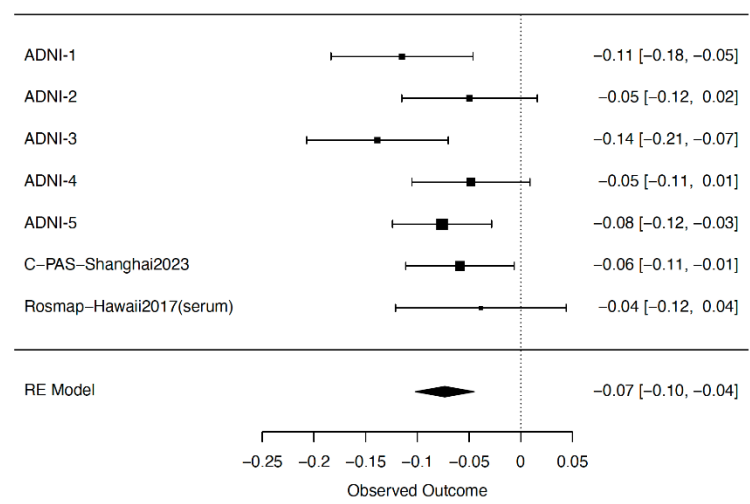

Glutamate

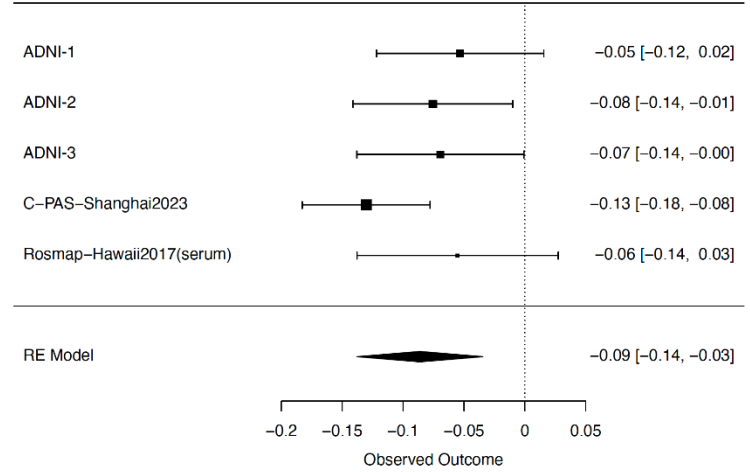

Glutamate/Glutamine

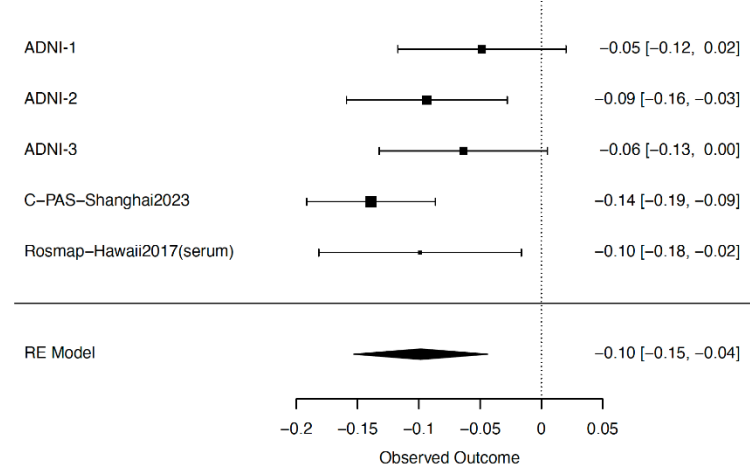

Glutamate/GABA

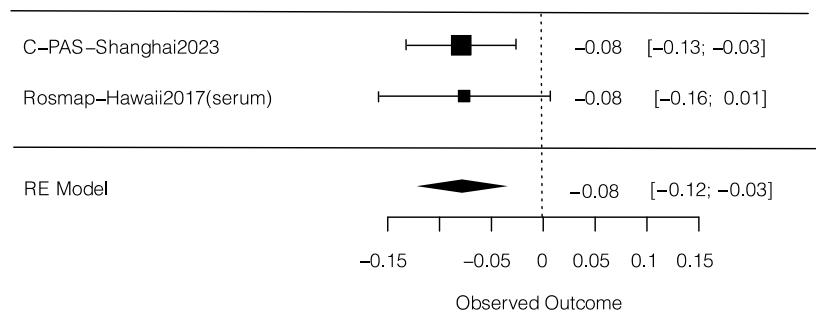

Cognition scores for ADNI, C-PAS, and ROSMAP data sets were ADAS-13, -1\*MMSE, and a composite measure of global cognition created by averaging the z-scores of all tests respectively.

## Methods

### 1. Neuropsychological measurements and clinical diagnosis in C-PAS

All participants in the C-PAS study had to fulfill the following criteria: (1) Age between 40 and 90 years with a minimum education duration of more than 1 year; (2) Absence of severe hearing or visual impairment, and proficiency in Mandarin communication; (3) Willingness to complete neuropsychological tests, cranial MRI, brain PET scans, and blood biomarker assessments; (4) No history of stroke, craniocerebral injury, brain tumor, anxiety, depression, or other conditions potentially impacting cognitive function adversely.

Brief cognitive screening tests included the Chinese version of Mini-Mental State Examination (MMSE)<sup>1</sup>, Montreal Cognitive Assessment-Basic (MoCA-BC)<sup>2</sup> and Addenbrooke's Cognitive Examination-III (ACE-III-CV)<sup>3</sup>. Various cognitive domains were evaluated through standardized neuropsychological tests: Auditory Verbal Learning Test (AVLT)<sup>4</sup> and Brief Visuospatial Memory Test-Revised (BVM-T-R)<sup>5</sup> for memory; Boston Naming Test (BNT)<sup>6</sup> and Animal Verbal Fluency Test (AFT)<sup>7</sup> for language; Shape Trail Test Part A and B (STT-A, STT-B)<sup>8</sup> for executive function; Judgement of Line Orientation(JLO)<sup>9</sup> for visuospatial ability; Symbol Digit Modalities Test (SDMT) and Digit Span Test(DST)<sup>10</sup> for attention. Global functional status was assessed by Activities of Daily Living (ADL)<sup>11</sup> and Functional Assessment Questionnaire (FAQ)<sup>12</sup>.

Participants with no cognitive complaint and objective cognitive impairment assessed via neuropsychological tests were defined as cognitively normal (CN). Those with self-reported memory decline but performed essentially normal on neuropsychological tests were classified as Subjective Cognitive Decline (SCD) according to the conceptual framework proposed by the working group of SCD Initiative (SCD-I)<sup>13</sup>. Mild cognitive impairment (MCI) was diagnosed according to the actuarial neuropsychological criteria put forward by Jak and Bondi<sup>14</sup>. Participants were classified as having dementia according to the criteria of Diagnostic and Statistical Manual of Mental Disorders, 4th edition- revised, and the clinical diagnosis of probable AD dementia was made according to the NIA-AA criteria<sup>15</sup>.

## 2. Brain PET neuroimaging acquisition and preprocessing

[<sup>18</sup>F]Florbetapir PET/CT scans were employed to evaluate A $\beta$  plaques in the brain. The tracer was produced in the Department of Nuclear Medicine & PET Center, Huashan Hospital, Fudan University, adhering to Good Manufacturing Practice (GMP) conditions.

PET/CT imaging was performed using PET/CT scanners (Biograph mCT Flow, Siemens, Erlangen, Germany) with parameters described previously<sup>16, 17</sup>. Twenty-minute scans were conducted 50 minutes post-injection of approximately ~37 MBq/kg ( $\pm 10\%$ ) of [<sup>18</sup>F]florbetapir intravenously. Following acquisition, the PET images underwent reconstruction using a filtered back-projection algorithm with corrections for decay, normalization, dead time, photon attenuation, scatter, and random coincidences. PET image preprocessing was conducted using SPM12 (Wellcome Trust Centre for Neuroimaging, London, UK; <https://www.fil.ion.ucl.ac.uk/spm>) and CAT12 (<http://www.neuro.uni-jena.de/cat>) following a previously outlined procedure<sup>18, 19</sup>. After reorienting PET and T1-weighted MR images, PET images were co-registered to individual T1-weighted images. Subsequently, the T1-weighted images were segmented using CAT12, and the generated tissue-labeled images were utilized for partial volume correction (PVC) of PET images employing the Muller-Gartner method<sup>20</sup>. Then the deformation field file from segmentation was used to transform corresponding PET images into the MNI space, and finally images were smoothed using a Gaussian filter with a full width at half of the maximum (FWHM) equal to 8 mm. The global cortical A $\beta$  burden was computed using the preprocessed images in MNI space, represented as the mean SUVR in cortical area, including posterior cingulate, precuneus, frontal, lateral parietal, lateral temporal, medial temporal, and occipital regions.

## 3. Quantitative measurement and pretreatment of metabolic data (C-PAS)

Targeted metabolites (n=189) from 12 metabolite types were quantitatively measured using a metabolite array technology (developed by our group in 2021) with an ultra-performance liquid chromatography coupled to tandem mass

spectrometry system (UPLC-MS/MS)<sup>21</sup>. This automatic and high-throughput system allows for the simultaneous determination of as many metabolites as possible, approximately 200, spanning various classes. We constructed a combined MS library of 3-NPH derivatives from structurally diverse compounds to facilitate metabolite identification. The system demonstrated excellent linearity, reproducibility, and stability, making it suitable for large clinical applications. However, it's important to note that, like any technology, there are limitations. The coverage of certain metabolite classes, such as many lipid classes, is limited to ensure stability and accuracy.

All the samples were prepared and quantified by the same staff using the same protocol. Lab staffs were blinded to diagnosis and pathological data. In addition to the internal standards for quality control, test mixtures (a group of commercially available standards with a mass range across the system mass range at 3 concentrations, low, medium, and high, within the range of the calibration curves), and pooled biological samples were used as well. The quality control samples were evenly inserted in the running sequence to monitor the stability of the analysis. The raw data files were processed using the TMBQ software (V1.0, HMI, Shenzhen, China) including peak integration, calibration, quantification, quality control, and batch effect adjustment for each metabolite, according to the manufacturer's instructions. In total, 199 metabolites were measured, and 10 that fell below the limit of quantification were excluded from subsequent analysis. Outliers were identified using Cauchy distribution robust fit ( $K \sigma=7$ ). Outliers (<0.2%) and missing values (<0.1%) were replaced using multivariate normal imputation. The data were logarithmic transformed (base=2) to normalize their distribution for statistical analysis.

#### 4. Meta-analysis

A total of 9 data sets were involved in the meta-analysis, including 7 from ADNI, 1 from ROSMAP, and our C-PAS. These data sets had to meet the following criteria: 1) derived from peripheral blood samples; 2) from AD-related studies with clinical or pathological diagnosis (containing at least CN and AD stages); 3) with at least one

indicator of global cognitive function; 4) with age and sex information; 5) with test results for at least one of the 13 metabolic features; 6) related data are accessible.

Statistical independence constitutes a fundamental assumption in a meta-analysis when pooling effect sizes<sup>22</sup>. The presence of dependency between samples or data can artificially attenuate heterogeneity, potentially leading to spurious positive findings<sup>23</sup>. This issue is known as the unit-of-analysis error. Considering the overlaps of samples in ADNI studies, we employed the three-level meta-analysis models on the identified features to evaluate their standardized mean differences between CN and AD ((mean level of ADs - mean level of CNs) / S.D. of CNs and ADs) and their correlations with global cognition (partial spearman correlation adjusting age and sex). Features were scaled to 0-1 within each data set to correct batch effect. Outliers (<0.2%) were identified by Local Outlier Factor and were excluded for analysis. All applicable data sets and the independence between them (which datasets have duplicate samples) were entered at once.

The three-level meta-analysis model is a meta-analysis method specifically designed to address dependencies between samples or data<sup>24, 25</sup>. A three-level model consists of three levels of pooling. Initially, researchers combine the results of individual participants within their primary studies to report an aggregated effect size / correlation. Subsequently, at level 2, these effect sizes / correlations are nested within multiple clusters. Finally, pooling the aggregated cluster effects / correlations yields the overall true effect size  $\mu$ .

Level 1 model:

$$\hat{\theta}_{ij} = \theta_{ij} + \epsilon_{ij}$$

Level 2 model:

$$\theta_{ij} = \kappa_j + \varsigma(2)_{ij}$$

Level 3 model:

$$\kappa_j = \mu + \varsigma(3)_j$$

Here,  $\hat{\theta}_{ij}$  represents an estimate of the true effect size  $\theta_{ij}$ , with  $ij$  indicating "effect size  $i$  nested in cluster  $j$ ." The parameter  $\kappa_j$  denotes the average effect size within cluster  $j$ ,

while  $\mu$  represents the overall average population effect. These formulas can be combined into a single line as follows:

$$\hat{\theta}_{ij} = \mu + \zeta(2)_{ij} + \zeta(3)_j + \epsilon_{ij}$$

This formula now encompasses two sources of heterogeneity:  $\zeta(2)_{ij}$ , signifying within-cluster heterogeneity at level 2, and  $\zeta(3)_j$ , representing between-cluster heterogeneity at level 3. Consequently, fitting a three-level meta-analysis model necessitates estimating not only one heterogeneity variance parameter ( $\tau^2$ ) but also two (one for level 2 and another for level 3).

We fitted the three-level meta-analysis models using the `rma.mv` function in the `metafor` package, employing maximum likelihood procedures<sup>26</sup>.

## Discussion

### 1. Potential Impacts of Age, Sex, Education Year, and *APOE*- $\epsilon$ 4 Status on the Association of Metabolic Profiles and AD Progression

The association of metabolic profiles with AD progression is intricately influenced by various factors. Factors such as age, sex, education year, and *APOE*- $\epsilon$ 4 status are recognized as significant contributors, often exerting greater impacts than other variables<sup>27, 28, 29</sup>.

**Age:** Age, a primary non-modifiable risk factor for AD, is intricately linked to alterations in metabolic profiles during cognitive aging and AD development. These changes encompass dysregulated levels of BCAAs, modified bile acids, abnormal glutamine-glutamate cycle, impaired beta-amyloid clearance, and alterations in phosphatidylcholines (PCs) and sphingomyelins (SMs) in fatty acid composition and levels<sup>30</sup>. Specific metabolites exhibit differential associations with cognitive decline and AD across various age groups. For instance, serum total cholesterol (TC) and low-density lipoprotein cholesterol (LDL-C) represent age-dependent risk factors for cognitive impairment among elderly participants, suggesting potential interactions between metabolites and age in AD<sup>28</sup>. Metabolome-wide association studies support this, revealing several metabolite-by-age interactions significantly correlated with executive function, an early aspect of cognition affected during AD progression<sup>29</sup>. The differential rates of metabolism for these particular metabolites could explain age-specific associations, necessitating compensatory mechanisms during younger years to account for rapid metabolism<sup>29</sup>.

***APOE*- $\epsilon$ 4 Status:** The influence of *APOE*- $\epsilon$ 4 as a risk factor for AD has long been recognized, impacting cholesterol transport, brain lipid composition, beta-amyloid elimination, and neuroinflammation<sup>31</sup>. Recently, it has emerged as a modifier of AD metabolism, with stratified analyses demonstrating *APOE*- $\epsilon$ 4-dependent heterogeneous effects of metabolites on AD. Certain metabolites, such as PCs and proline, exhibit specific effects in female  $\epsilon$ 4 carriers<sup>27</sup>.

**Sex:** Sex-based modulation of the associations between metabolites and AD biomarkers has been substantiated, with direct evidence pointing to sex-dependent

alterations in various metabolic pathways, including GABA synthesis, arginine biosynthesis, alanine, aspartate, and glutamate metabolism, fatty acid elongation, and lysophospholipid metabolism<sup>32</sup>. Stratified analysis on ADNI data has highlighted substantial heterogeneity between sexes, emphasizing potential sex-specific interactions of metabolites and dysregulations in energy metabolism, energy homeostasis, and stress response. Notably, specific metabolic effects were identified in female  $\epsilon 4$  carriers<sup>27, 28</sup>.

**Education:** Education is linked to enhanced cognitive reserve and improved metabolic performance associated with AD, yet its potential influence on the association between metabolites and AD remains ambiguous<sup>31</sup>. A Mendelian randomization study confirmed that the protective effect of education against AD is largely attributable to better cognition<sup>33</sup>. Individuals with higher education tend to participate in brain-stimulating activities and adopt healthier lifestyles, which are conducive to metabolic health<sup>34</sup>.

**Multiple factors:** Studies addressing the interplay of multiple factors on the association between metabolic profiles and AD are in their early stages. Distinct alterations in fatty acid metabolomics have been observed in *APOE- $\epsilon 4$*  non-carriers and women, suggesting a nuanced role for *APOE- $\epsilon 4$* -sex intertwined effects in metabolic pathways relevant to AD<sup>35</sup>. Age-related decreases in glutamate, GABA, and sphingolipids worsened with the increase of *APOE- $\epsilon 4$*  load, potentially contributing to deficits in synaptic, learning, and memory-related functions<sup>36</sup>. Interactions between sex and age have been underscored, supported by sex- and age-tailored correlations between serum lipids and cognitive impairment<sup>28</sup>.

## References

1. Katzman R, *et al.* A Chinese version of the Mini-Mental State Examination; impact of illiteracy in a Shanghai dementia survey. *J Clin Epidemiol* **41**, 971-978 (1988).
2. Huang L, *et al.* Chinese version of Montreal Cognitive Assessment Basic for discrimination among different severities of Alzheimer's disease. *Neuropsychiatr Dis Treat* **14**, 2133-2140 (2018).
3. Pan FF, Wang Y, Huang L, Huang Y, Guo QH. Validation of the Chinese version of Addenbrooke's cognitive examination III for detecting mild cognitive impairment. *Aging Ment Health* **26**, 384-391 (2022).
4. Zhao Q, *et al.* Auditory Verbal Learning Test is Superior to Rey-Osterrieth Complex Figure Memory for Predicting Mild Cognitive Impairment to Alzheimer's Disease. *Curr Alzheimer Res* **12**, 520-526 (2015).
5. Benedict RHB, Schretlen, D., Groninger, L., Dobraski, M., & Shpritz, B. . Revision of the Brief Visuospatial Memory Test: Studies of normal performance, reliability, and validity. . *Psychological Assessment* **8**, 145-153 (1996).
6. Guo Q.H. HZ, Shi W.X., Sun Y.M., Lv C.Z. Boston naming test using by Chinese elderly, patient with mild cognitive impairment and Alzheimer's dementia. *Journal of Chinese Mental Health* **20**, 81-85 (2006).
7. Zhao Q, Guo Q, Hong Z. Clustering and switching during a semantic verbal fluency test contribute to differential diagnosis of cognitive impairment. *Neurosci Bull* **29**, 75-82 (2013).
8. Zhao Q, Guo Q, Li F, Zhou Y, Wang B, Hong Z. The Shape Trail Test: application of a new variant of the Trail making test. *PLoS One* **8**, e57333 (2013).
9. Qualls CE, Bliwise NG, Stringer AY. Short forms of the Benton Judgment of Line Orientation Test: development and psychometric properties. *Arch Clin Neuropsychol* **15**, 159-163 (2000).
10. Wechsler D. Wechsler Adult Intelligence Scale—Fourth edition: Technical and interpretive manual. (2008).
11. Chen P, Yu ES, Zhang M, Liu WT, Hill R, Katzman R. ADL dependence and medical conditions in Chinese older persons: a population-based survey in Shanghai, China. *J Am Geriatr Soc* **43**, 378-383 (1995).
12. Pfeffer RI, Kurosaki TT, Harrah CH, Jr., Chance JM, Filos S. Measurement of functional activities in older adults in the community. *J Gerontol* **37**, 323-329 (1982).

13. Huang L, Chen K, Liu Z, Guo Q. A Conceptual Framework for Research on Cognitive Impairment with no Dementia in Memory Clinic. *Curr Alzheimer Res* **17**, 517-525 (2020).
14. Bondi MW, *et al.* Neuropsychological criteria for mild cognitive impairment improves diagnostic precision, biomarker associations, and progression rates. *J Alzheimers Dis* **42**, 275-289 (2014).
15. McKhann GM, *et al.* The diagnosis of dementia due to Alzheimer's disease: recommendations from the National Institute on Aging-Alzheimer's Association workgroups on diagnostic guidelines for Alzheimer's disease. *Alzheimer's & dementia : the journal of the Alzheimer's Association* **7**, 263-269 (2011).
16. Zhao Z, *et al.* 18F-AV45 PET and MRI Reveal the Influencing Factors of Alzheimer's Disease Biomarkers in Subjective Cognitive Decline Population. *Journal of Alzheimers Disease* **93**, (2023).
17. Wang J, *et al.* The Effect of Gender and APOE  $\epsilon 4$  Status on Brain Amyloid- $\beta$  Deposition in Different Age Groups of Mild Cognitively Impaired Individuals: A PET-CT Study. *Journal of Alzheimers Disease* **94**, 763-775 (2023).
18. Huang Q, *et al.* Changes in brain glucose metabolism and connectivity in somatoform disorders: an 18F-FDG PET study. *European Archives of Psychiatry and Clinical Neuroscience* **270**, 881-891 (2020).
19. Gasera C, Dahnke R, Thompsonb PM, Kurth F, Luders E. CAT – A Computational Anatomy Toolbox for the Analysis of Structural MRI Data. *bioRxiv*, (2022).
20. Gonzalez-Escamilla G, Lange C, Teipel S, Buchert R, Grothe MJ, Initiative ftAsDN. PETPVE12: an SPM toolbox for Partial Volume Effects correction in brain PET – Application to amyloid imaging with AV45-PET. *NeuroImage* **147**, 669-677 (2017).
21. Xie G, *et al.* A Metabolite Array Technology for Precision Medicine. *Anal Chem* **93**, 5709-5717 (2021).
22. Higgins JP, Green S. Cochrane handbook for systematic reviews of interventions. (2008).
23. Borenstein M, Hedges LV, Higgins JP, Rothstein HR. *Introduction to meta-analysis*. John Wiley & Sons (2021).
24. Cheung MW-L. Modeling dependent effect sizes with three-level meta-analyses: a structural equation modeling approach. *Psychological methods* **19**, 211 (2014).
25. Assink M, Wibbelink CJ. Fitting three-level meta-analytic models in R: A step-by-step

tutorial. *The Quantitative Methods for Psychology* **12**, 154-174 (2016).

26. Harrer M, Cuijpers P, Furukawa TA, Ebert DD. *Doing meta-analysis with R: A hands-on guide*. CRC press (2021).
27. Arnold M, *et al.* Sex and APOE  $\epsilon$ 4 genotype modify the Alzheimer's disease serum metabolome. *Nature communications* **11**, 1148 (2020).
28. Zhao B, *et al.* The gender- and age- dependent relationships between serum lipids and cognitive impairment: a cross-sectional study in a rural area of Xi'an, China. *Lipids Health Dis* **18**, 4 (2019).
29. Darst BF, *et al.* Metabolites Associated with Early Cognitive Changes Implicated in Alzheimer's Disease. *Journal of Alzheimer's Disease : JAD* **79**, 1041-1054 (2021).
30. Yu Z, *et al.* Human serum metabolic profiles are age dependent. *Aging Cell* **11**, 960-967 (2012).
31. 2021 Alzheimer's disease facts and figures. *Alzheimers Dement* **17**, 327-406 (2021).
32. Strefeler A, *et al.* Molecular insights into sex-specific metabolic alterations in Alzheimer's mouse brain using multi-omics approach. *Alzheimer's Research & Therapy* **15**, 8 (2023).
33. Lord J, *et al.* Disentangling Independent and Mediated Causal Relationships Between Blood Metabolites, Cognitive Factors, and Alzheimer's Disease. *Biol Psychiatry Glob Open Sci* **2**, 167-179 (2022).
34. Green R, *et al.* Metabolic correlates of late midlife cognitive outcomes: findings from the 1946 British Birth Cohort. *Brain Commun* **4**, fcab291 (2022).
35. González-Domínguez R, *et al.* Apolipoprotein E and sex modulate fatty acid metabolism in a prospective observational study of cognitive decline. *Alzheimer's Research & Therapy* **14**, 1 (2022).
36. Dong Y, Brewer GJ. Global Metabolic Shifts in Age and Alzheimer's Disease Mouse Brains Pivot at NAD<sup>+</sup>/NADH Redox Sites. *Journal of Alzheimer's Disease : JAD* **71**, 119-140 (2019).
